# Supplementary material
Source: MDPI journal article supplement (https://www.mdpi.com/2072-4292/10/5/784)
Supplement: s1 [file s1]

## Supplementary Materials

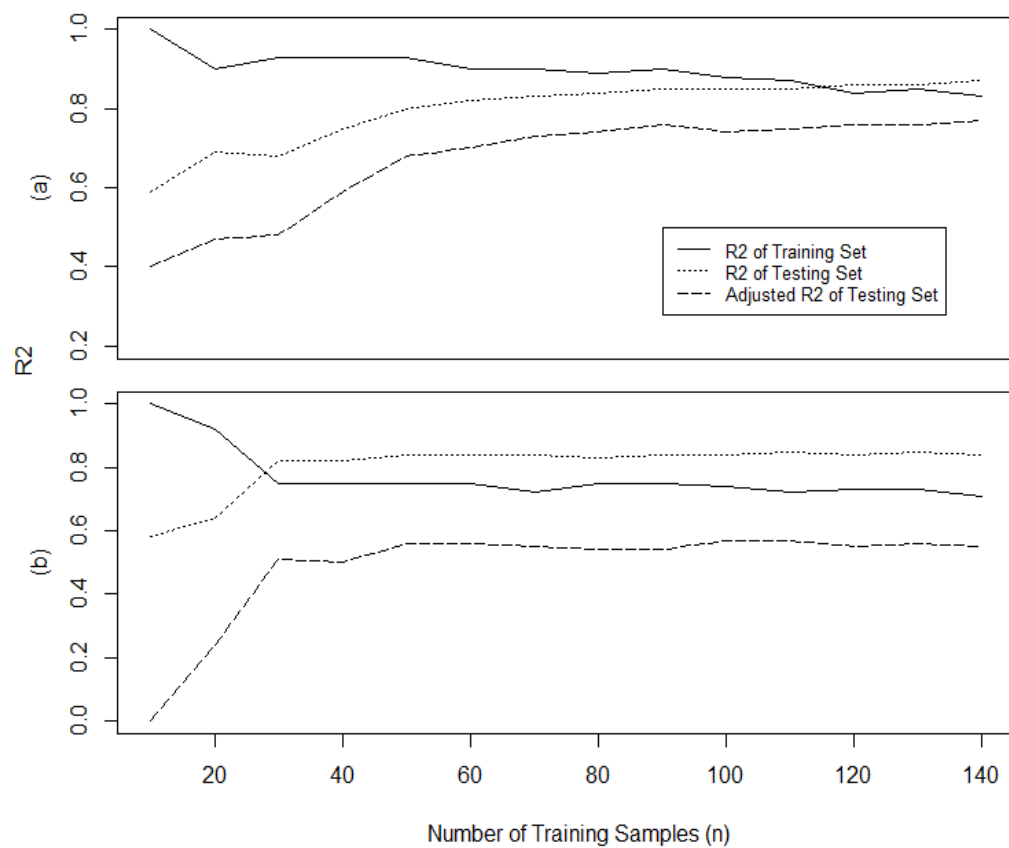

**Figure S1.** Coefficient of determination ( $R^2$ ) of Partial Least Square Regression (PLSR) using field spectral data to predict (a) cogongrass and (b) dead plant coverage using training sets of different sizes

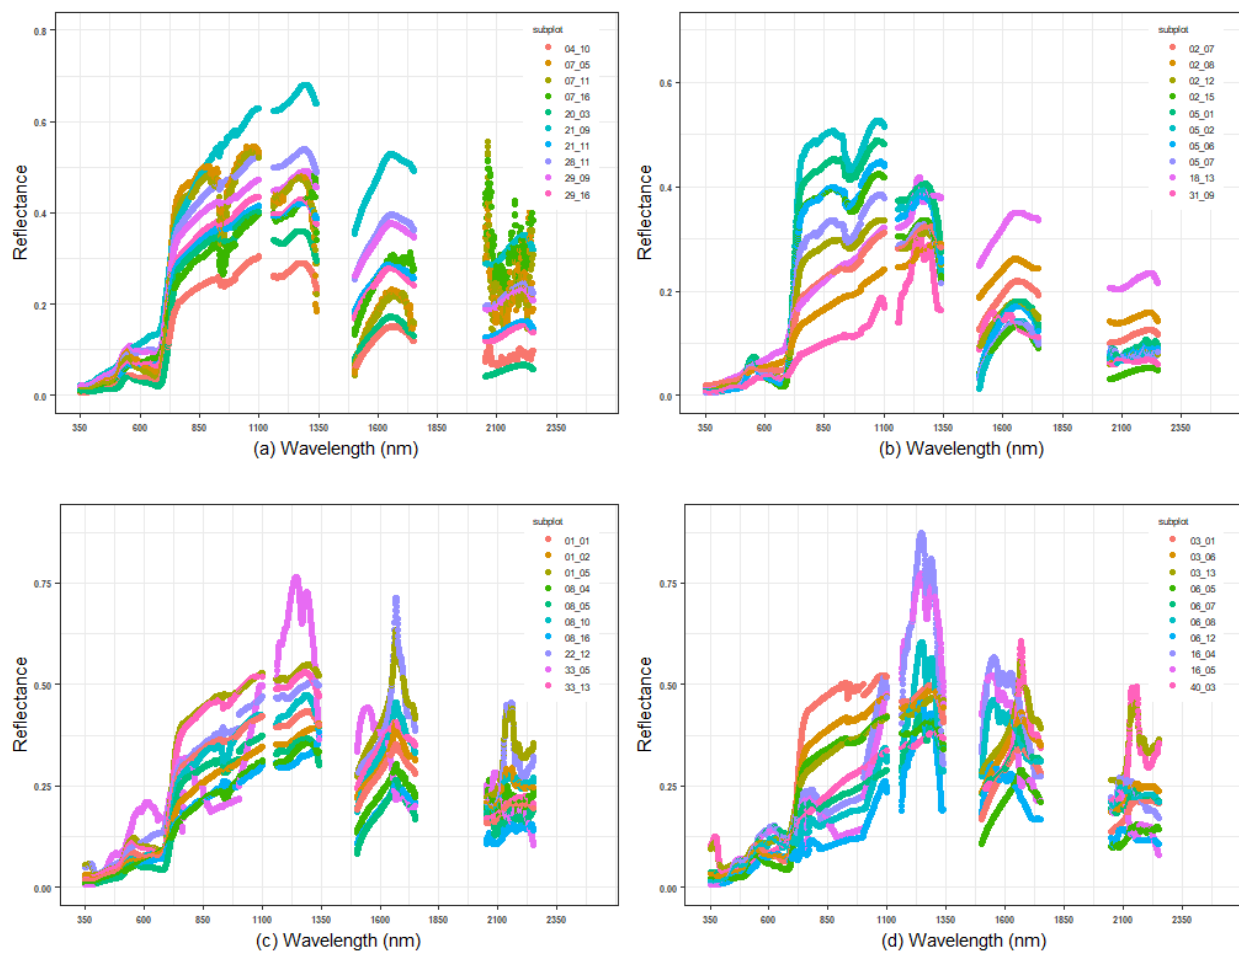

**Figure S2.** Reflectance of 10 subplots randomly selected from (a) ambient invaded subplots, (b) ambient uninvaded subplots, (c) drought invaded subplots, and (d) drought uninvaded subplots.

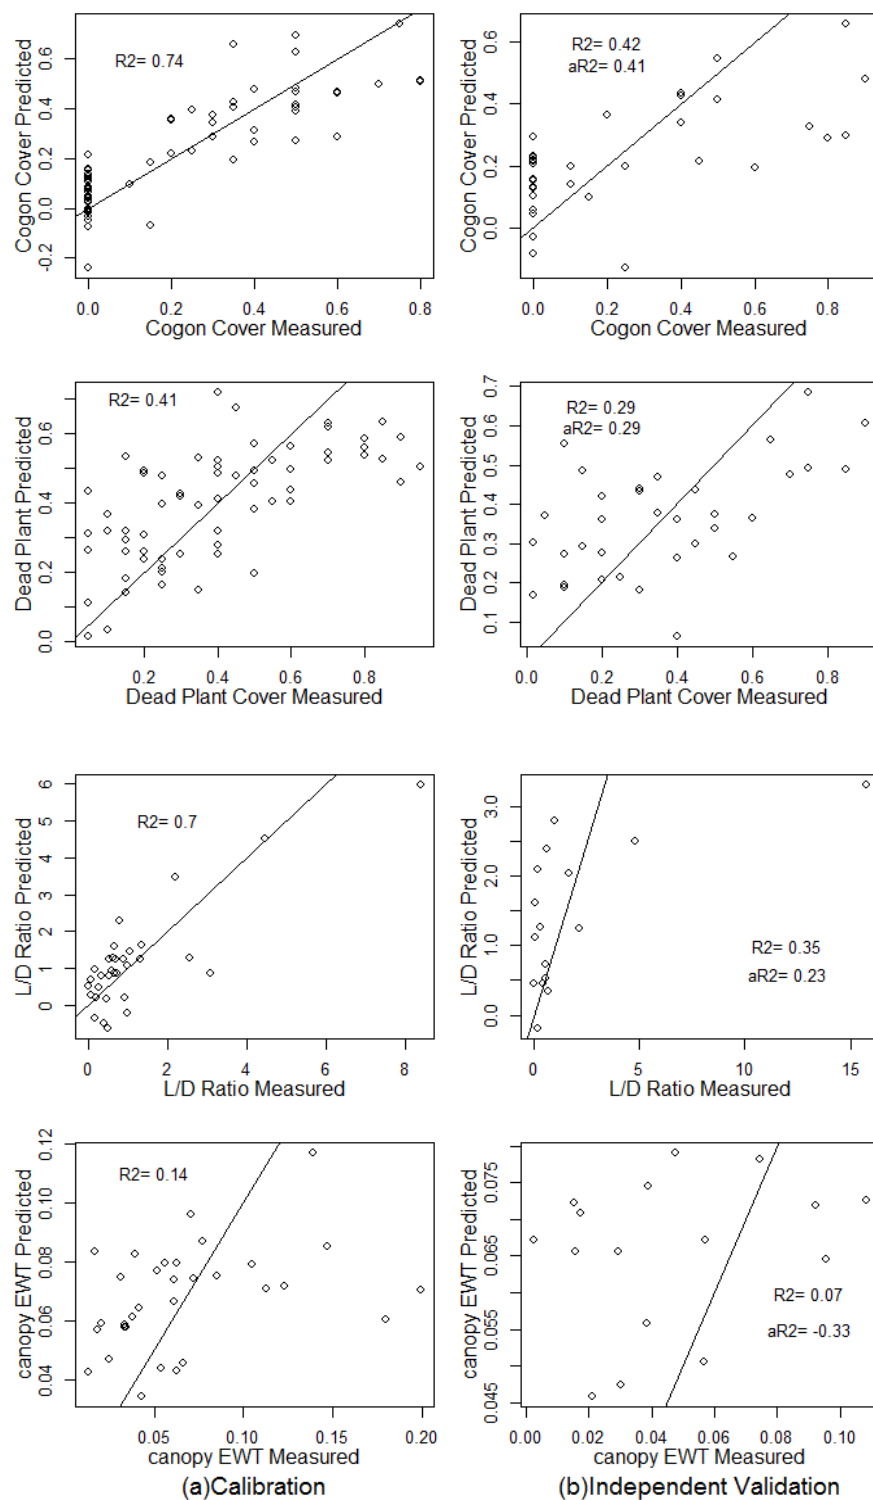

**Figure S3.** The results of PLSR models for cogongrass coverage, dead plant coverage, live to dead plant material ratio, and canopy EWT using original reflectance from drought dataset for calibration (column a) and independent validation (column b). The black lines are 1:1 line. R²=coefficient of determination, aR²=adjusted coefficient of determination. Results from the ambient subplots are found in the main text.

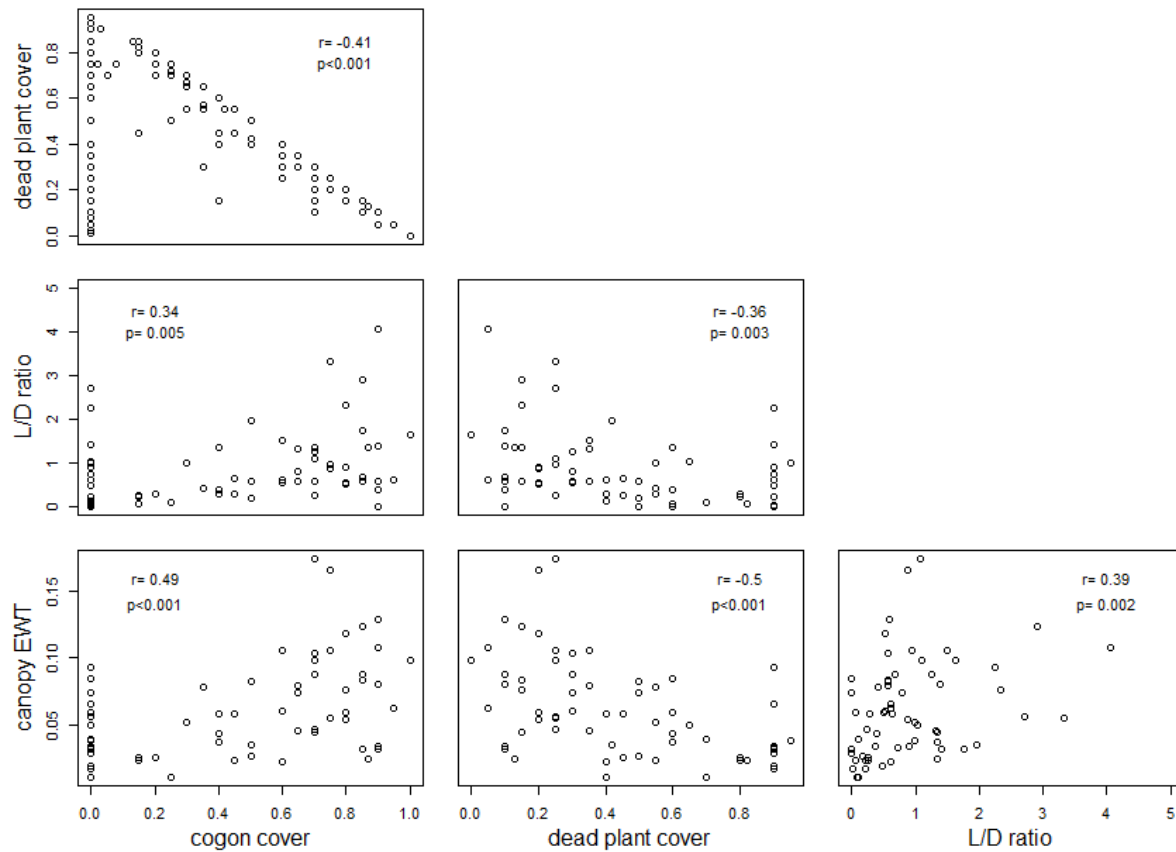

**Figure S4.** Pearson correlation between the vegetation characteristics under ambient treatment. The relationship between cogongrass coverage and dead plant coverage was developed from data taken in June 2015, February 2016, June 2016, December 2016, and March 2017 (N = 137). The other relationships were developed from data taken in February 2016, June 2016, and December 2017 (N = 64).

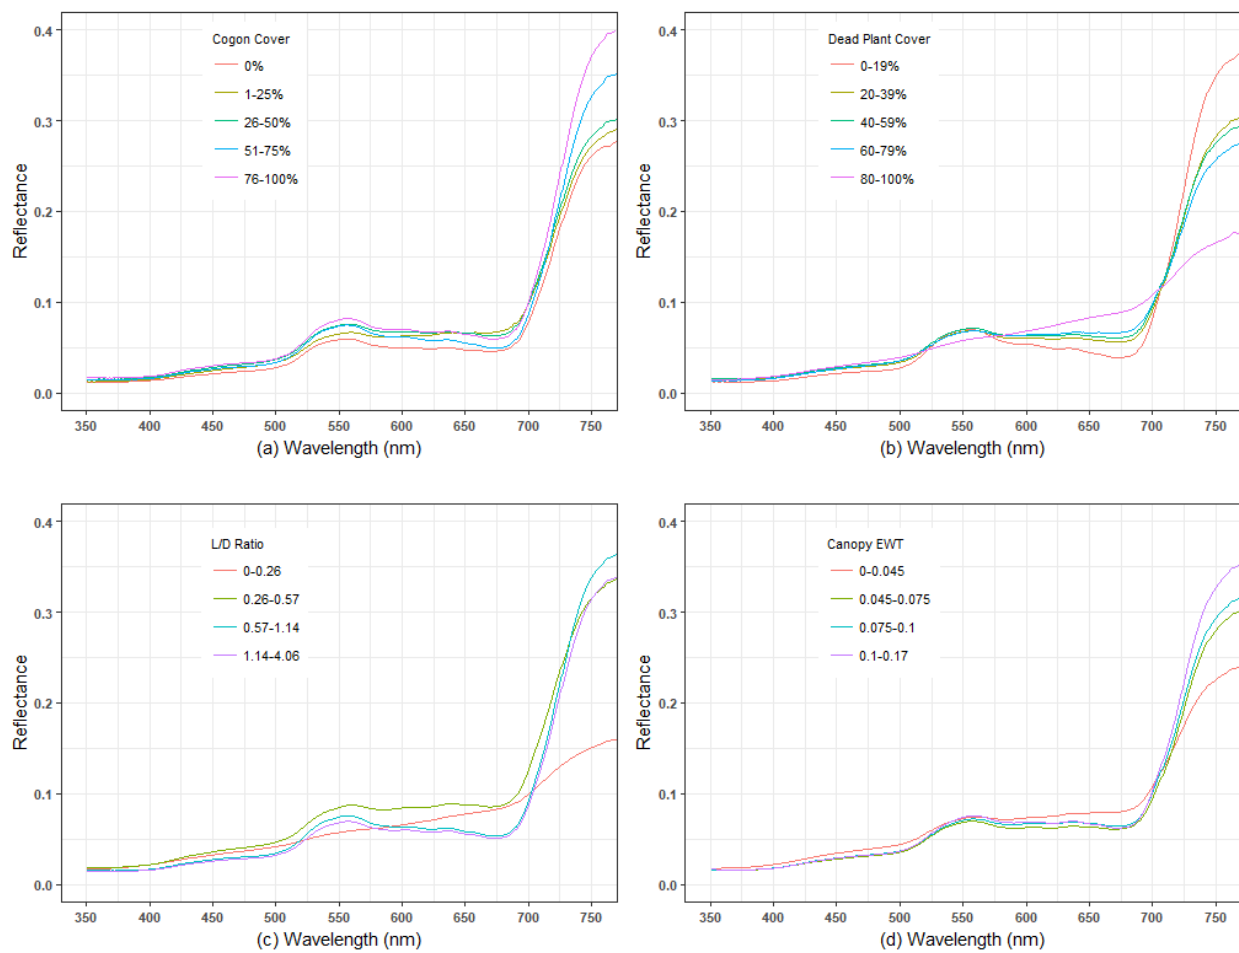

**Figure S5.** Mean hyperspectral reflectance in just the visible wavelength ranges for different quantiles of the following vegetation characteristics: (a) cogongrass coverage, (b) dead plant coverage, (c) live to dead plant material ratio, and (d) canopy EWT.

**Table S1.** The number of plant samples in each field campaign. L/D ratio is the ratio of live to dead plant material. Canopy EWT is canopy equivalent water thickness.

| Variable/Treatment<br>Period | Cogongrass Cover |         | Dead Plant Cover |         | L/D Ratio |         | Canopy EWT |         |
|------------------------------|------------------|---------|------------------|---------|-----------|---------|------------|---------|
|                              | Ambient          | Drought | Ambient          | Drought | Ambient   | Drought | Ambient    | Drought |
| June2015                     | 54               | 52      | 54               | 52      | 0         | 0       | 0          | 0       |
| Feb2016                      | 28               | 34      | 28               | 34      | 27        | 34      | 27         | 34      |
| June2016                     | 10               | 15      | 10               | 15      | 10        | 15      | 10         | 15      |
| Dec2016                      | 29               | 24      | 29               | 24      | 26        | 24      | 26         | 24      |
| Mar2017                      | 16               | 26      | 16               | 26      | 0         | 0       | 0          | 0       |
| Total                        | 137              | 151     | 137              | 151     | 64        | 73      | 64         | 73      |

**Table S2.** Predictive ability of hyperspectral estimation of vegetation characteristics using data from drought plots. Results for the ambient plots can be found in the main text. NL = number of latent variables; RMSE = root mean square error; C = calibration models using training data; P = independent validation models using testing data.

| Vegetation<br>Characteristic | NL | R <sup>2</sup> (C) | RMSE(C) | RE(C)   | R <sup>2</sup> (CV) | RMSE(CV) | RE(CV)  | R <sup>2</sup> (P) | R <sup>2</sup> <sub>adj</sub> (P) | RMSE(P) | RE(P)   |
|------------------------------|----|--------------------|---------|---------|---------------------|----------|---------|--------------------|-----------------------------------|---------|---------|
| Cogon Cover                  | 15 | 0.79               | 0.12    | 49.64%  | 0.55                | 0.19     | 79.12%  | 0.47               | 0.46                              | 0.21    | 86.68%  |
| Dead Plant Cover             | 9  | 0.68               | 0.15    | 28.61%  | 0.53                | 0.18     | 38.36%  | 0.47               | 0.46                              | 0.19    | 46.17%  |
| L/D Ratio                    | 6  | 0.48               | 1.78    | 140.97% | 0.22                | 1.93     | 163.44% | 0.29               | -1.16                             | 1.88    | 186.70% |
| Canopy EWT                   | 4  | 0.21               | 0.03    | 55.75%  | 0.04                | 0.04     | 67.38%  | 0.09               | 0.06                              | 0.04    | 70.86%  |

**Table S3.** The results from a nonparametric analysis of variance (Kruskal-Wallis test) for sampling period, cogongrass introduction, and their interaction among experimental subplots in (a) cogongrass coverage, (b) dead plant coverage, (c) live to dead plant material ratio, and (d) canopy EWT.

| Treatment                            | Kruskal-Wallis H | P value |
|--------------------------------------|------------------|---------|
| (a) cogongrass cover                 |                  |         |
| sampling period                      | 21.6             | <0.001  |
| (b) dead plant cover                 |                  |         |
| sampling period                      | 28.9             | <0.001  |
| cogongrass introduction              | 0.8              | = 0.364 |
| interaction of period and cogongrass | 83.2             | <0.001  |
| (c) L/D ratio                        |                  |         |

|                                         |      |         |
|-----------------------------------------|------|---------|
| sampling period                         | 1.7  | = 0.420 |
| cogongrass introduction                 | 3.0  | = 0.083 |
| interaction of period and<br>cogongrass | 21.2 | <0.001  |
| <hr/>                                   |      |         |
| (d) canopy EWT                          |      |         |
| sampling period                         | 13.8 | = 0.001 |
| cogongrass introduction                 | 4.8  | = 0.029 |
| interaction of period and<br>cogongrass | 23.3 | <0.001  |
| <hr/>                                   |      |         |
